# Supplementary material
Source: Research Square preprint supplement (doi:10.21203/rs.3.rs-10231223/v1)

In the Pearson correlation analysis of this study, we used systolic blood pressure (SBP) as the core variable to investigate its linear associations with demographic characteristics, lifestyle factors, and health indicators in Table S1. The results showed that SBP was significantly positively correlated with age (r=0.255, P<0.001) and body mass index (BMI) (r=0.215, P=0.002). The correlations between SBP and gender, educational level, smoking history, Mediterranean Diet Score (MDS), and Pittsburgh Sleep Quality Index (PSQI) were not statistically significant (P>0.05). In addition, multiple meaningful associations were observed among other variables: male sex was strongly positively correlated with alcohol consumption (r=0.540, P<0.001) and smoking (r=0.532, P<0.001); age was negatively correlated with educational level (r=-0.428, P<0.001); MDS was positively correlated with alcohol consumption (r=0.429, P<0.001), smoking (r=0.169, P=0.017), and PSQI (r=0.184, P=0.009), while negatively correlated with BMI (r=-0.144, P=0.041).

**Table S1**

Pearson correlation matrix among study variables（n=201）

| **SBP** |  | **Blood pressure** | **Gender** | **Age** | **Education** | **Alcohol** | **Smoking** | **BMI(kg/m2)** | **MDS** | **PQSI** |
| --- | --- | --- | --- | --- | --- | --- | --- | --- | --- | --- |
| Blood pressure | Pearson correlation coefficient | 1 | -0.116 | .255** | -0.09 | -.188** | -0.093 | .215** | -0.123 | -0.071 |
|  | Sig. (2-tailed) |  | 0.102 | 0 | 0.204 | 0.008 | 0.19 | 0.002 | 0.081 | 0.315 |
|  | N | 201 | 201 | 201 | 201 | 201 | 201 | 201 | 201 | 201 |
| Gender | Pearson correlation coefficient | -0.116 | 1 | -0.004 | -0.132 | .540** | .532** | -0.065 | .340** | 0.1 |
|  | Sig. (2-tailed) | 0.102 |  | 0.96 | 0.063 | 0 | 0 | 0.362 | 0 | 0.159 |
|  | N | 201 | 201 | 201 | 201 | 201 | 201 | 201 | 201 | 201 |
| Age | Pearson correlation coefficient | .255** | -0.004 | 1 | -.428** | .160* | .270** | -0.024 | -0.018 | 0.068 |
|  | Sig. (2-tailed) | 0 | 0.96 |  | 0 | 0.023 | 0 | 0.74 | 0.803 | 0.34 |
|  | N | 201 | 201 | 201 | 201 | 201 | 201 | 201 | 201 | 201 |
| Education | Pearson correlation coefficient | -0.09 | -0.132 | -.428** | 1 | -.145* | -.181* | 0.001 | -0.059 | -0.046 |
|  | Sig. (2-tailed) | 0.204 | 0.063 | 0 |  | 0.04 | 0.01 | 0.991 | 0.402 | 0.518 |
|  | N | 201 | 201 | 201 | 201 | 201 | 201 | 201 | 201 | 201 |
| Alcohol | Pearson correlation coefficient | -.188** | .540** | .160* | -.145* | 1 | .466** | -0.087 | .429** | 0.056 |
|  | Sig. (2-tailed) | 0.008 | 0 | 0.023 | 0.04 |  | 0 | 0.217 | 0 | 0.434 |
|  | N | 201 | 201 | 201 | 201 | 201 | 201 | 201 | 201 | 201 |
| Smoking | Pearson correlation coefficient | -0.093 | .532** | .270** | -.181* | .466** | 1 | -0.087 | .169* | 0.034 |
|  | Sig. (2-tailed) | 0.19 | 0 | 0 | 0.01 | 0 |  | 0.22 | 0.017 | 0.63 |
|  | N | 201 | 201 | 201 | 201 | 201 | 201 | 201 | 201 | 201 |
| BMI(kg/m2) | Pearson correlation coefficient | .215** | -0.065 | -0.024 | 0.001 | -0.087 | -0.087 | 1 | -.144* | -0.07 |
|  | Sig. (2-tailed) | 0.002 | 0.362 | 0.74 | 0.991 | 0.217 | 0.22 |  | 0.041 | 0.323 |
|  | N | 201 | 201 | 201 | 201 | 201 | 201 | 201 | 201 | 201 |
| MDS | Pearson correlation coefficient | -0.123 | .340** | -0.018 | -0.059 | .429** | .169* | -.144* | 1 | .184** |
|  | Sig. (2-tailed) | 0.081 | 0 | 0.803 | 0.402 | 0 | 0.017 | 0.041 |  | 0.009 |
|  | N | 201 | 201 | 201 | 201 | 201 | 201 | 201 | 201 | 201 |
| PSQI | Pearson correlation coefficient | -0.071 | 0.1 | 0.068 | -0.046 | 0.056 | 0.034 | -0.07 | .184** | 1 |
|  | Sig. (2-tailed) | 0.315 | 0.159 | 0.34 | 0.518 | 0.434 | 0.63 | 0.323 | 0.009 |  |
|  | N | 201 | 201 | 201 | 201 | 201 | 201 | 201 | 201 | 201 |

*Significant difference at *P*<0.05. **Significant difference at *P*<0.01. ***Significant difference at *P*<0.001.

In the Pearson correlation analysis of this study, diastolic blood pressure (DBP) served as the core variable in Table S2. The results showed that DBP was significantly negatively correlated with gender (r = -0.267, P < 0.001), alcohol consumption (r = -0.142, P = 0.045), smoking (r = -0.184, P = 0.009), and Mediterranean Diet Score (MDS) (r = -0.158, P = 0.025). No significant correlations were observed between DBP and age, education, BMI, or PSQI (all P > 0.05). Additionally, several meaningful associations among other variables were identified: male sex was strongly positively correlated with alcohol consumption (r = 0.540, P < 0.001) and smoking (r = 0.532, P < 0.001); age was negatively correlated with education level (r = -0.428, P < 0.001); MDS was positively correlated with alcohol consumption (r = 0.429, P < 0.001), smoking (r = 0.169, P = 0.017), and PSQI (r = 0.184, P = 0.009), while negatively correlated with BMI (r = -0.144, P = 0.041).

**Table S2**

Pearson correlation matrix among study variables（n=201）

| **DBP** |  | **Blood pressure** | **Gender** | **Age** | **Education** | **alcohol** | **Smoking** | **BMI(kg/m2)** | **MDS** | **PQSI** |
| --- | --- | --- | --- | --- | --- | --- | --- | --- | --- | --- |
| Blood pressure | Pearson correlation coefficient | 1 | -.267** | -0.084 | -0.082 | -.142* | -.184** | 0.033 | -.158* | 0.051 |
|  | Sig. (2-tailed) |  | 0 | 0.235 | 0.246 | 0.045 | 0.009 | 0.645 | 0.025 | 0.471 |
|  | N | 201 | 201 | 201 | 201 | 201 | 201 | 201 | 201 | 201 |
| Gender | Pearson correlation coefficient | -.267** | 1 | -0.004 | -0.132 | .540** | .532** | -0.065 | .340** | 0.1 |
|  | Sig. (2-tailed) | 0 |  | 0.96 | 0.063 | 0 | 0 | 0.362 | 0 | 0.159 |
|  | N | 201 | 201 | 201 | 201 | 201 | 201 | 201 | 201 | 201 |
| Age | Pearson correlation coefficient | -0.084 | -0.004 | 1 | -.428** | .160* | .270** | -0.024 | -0.018 | 0.068 |
|  | Sig. (2-tailed) | 0.235 | 0.96 |  | 0 | 0.023 | 0 | 0.74 | 0.803 | 0.34 |
|  | N | 201 | 201 | 201 | 201 | 201 | 201 | 201 | 201 | 201 |
| Education | Pearson correlation coefficient | -0.082 | -0.132 | -.428** | 1 | -.145* | -.181* | 0.001 | -0.059 | -0.046 |
|  | Sig. (2-tailed) | 0.246 | 0.063 | 0 |  | 0.04 | 0.01 | 0.991 | 0.402 | 0.518 |
|  | N | 201 | 201 | 201 | 201 | 201 | 201 | 201 | 201 | 201 |
| Alcohol | Pearson correlation coefficient | -.142* | .540** | .160* | -.145* | 1 | .466** | -0.087 | .429** | 0.056 |
|  | Sig. (2-tailed) | 0.045 | 0 | 0.023 | 0.04 |  | 0 | 0.217 | 0 | 0.434 |
|  | N | 201 | 201 | 201 | 201 | 201 | 201 | 201 | 201 | 201 |
| Smoking | Pearson correlation coefficient | -.184** | .532** | .270** | -.181* | .466** | 1 | -0.087 | .169* | 0.034 |
|  | Sig. (2-tailed) | 0.009 | 0 | 0 | 0.01 | 0 |  | 0.22 | 0.017 | 0.63 |
|  | N | 201 | 201 | 201 | 201 | 201 | 201 | 201 | 201 | 201 |
| BMI(kg/m2) | Pearson correlation coefficient | 0.033 | -0.065 | -0.024 | 0.001 | -0.087 | -0.087 | 1 | -.144* | -0.07 |
|  | Sig. (2-tailed) | 0.645 | 0.362 | 0.74 | 0.991 | 0.217 | 0.22 |  | 0.041 | 0.323 |
|  | N | 201 | 201 | 201 | 201 | 201 | 201 | 201 | 201 | 201 |
| MDS | Pearson correlation coefficient | -.158* | .340** | -0.018 | -0.059 | .429** | .169* | -.144* | 1 | .184** |
|  | Sig. (2-tailed) | 0.025 | 0 | 0.803 | 0.402 | 0 | 0.017 | 0.041 |  | 0.009 |
|  | N | 201 | 201 | 201 | 201 | 201 | 201 | 201 | 201 | 201 |
| PSQI | Pearson correlation coefficient | 0.051 | 0.1 | 0.068 | -0.046 | 0.056 | 0.034 | -0.07 | .184** | 1 |
|  | Sig. (2-tailed) | 0.471 | 0.159 | 0.34 | 0.518 | 0.434 | 0.63 | 0.323 | 0.009 |  |
|  | N | 201 | 201 | 201 | 201 | 201 | 201 | 201 | 201 | 201 |

*Significant difference at *P*<0.05. **Significant difference at *P*<0.01. ***Significant difference at *P*<0.001

To examine whether the moderating effect of sleep quality was stable across different population subgroups, we further performed stratified analyses by sex, age, education level, drinking history, smoking history, and BMI in Table S3. The results showed that the interaction between diet and sleep quality on DBP was statistically significant only in the overweight group (BMI ≥ 24.9 kg/m²) (interaction coefficient β = -0.875, 95% CI: -1.582 to -0.168, P = 0.016), while no significant interaction effect was observed in the normal weight group or other subgroups (P > 0.05).

**Table S3**

The moderating effect of sleep quality and dietary type on blood pressure(DBP)


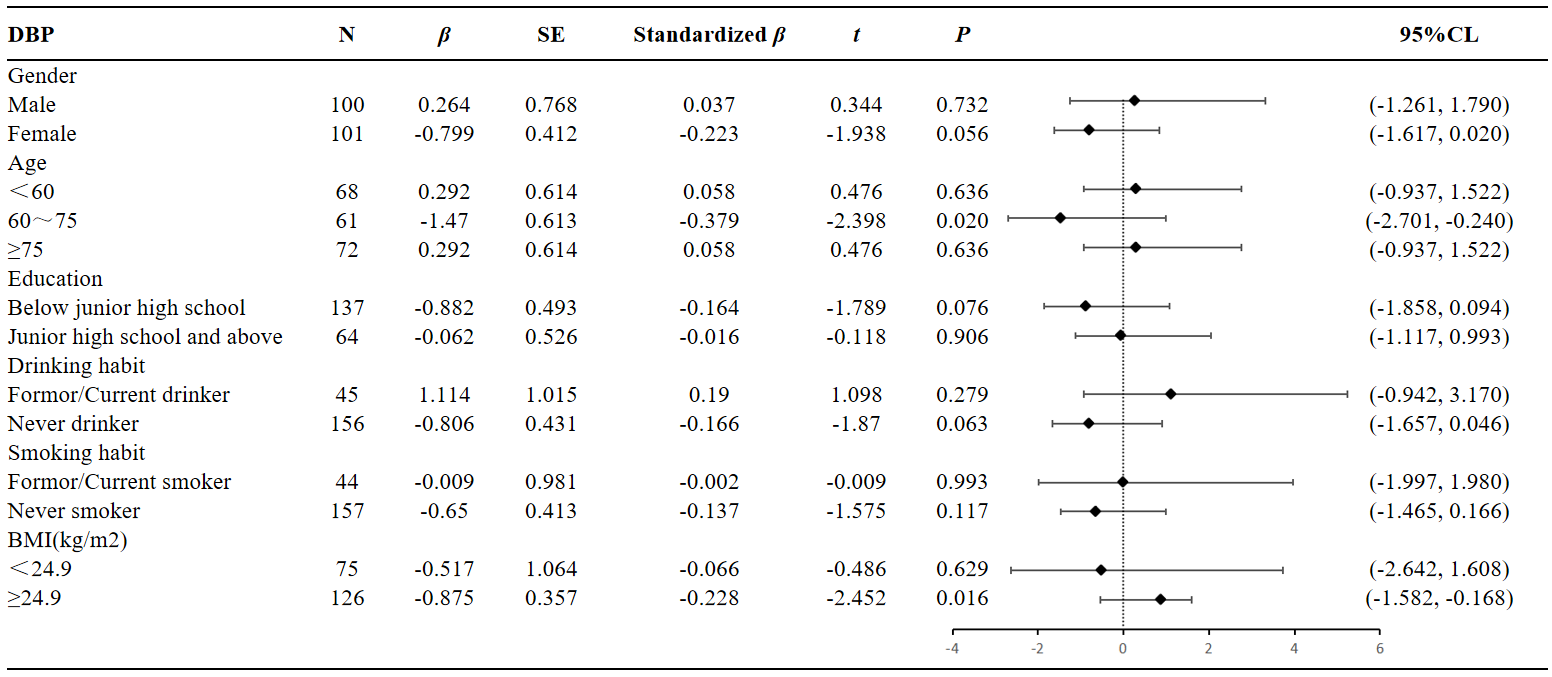

Supplement: Supplementary file 1 [file bb7eca717c8855eaeba57363.docx]
